# Supplementary material
Source: publisher figshare collection journal article supplement (https://gsapubs.figshare.com/ndownloader/files/22756409)
Supplement: Supplementary file 1 [file 22756409]

## **VOLCANO-STRATIGRAPHICAL DESCRIPTION OF THE SUBMARINE COMPLEX**

### **Submarine Volcanic Group**

Six formations have been distinguished in this lithostratigraphic group, which are described from bottom to top. Terminology is based on McPhie et al. (1993).

#### ***Barranco del Tarajalito Formation***

This unit contains volcanogenic facies associations, of either ultra-alkaline (nephelinites, nepheline phonolites, pyroxenites, kaersutites, melteigites-ijolites, and nepheline syenites) or strongly alkaline rocks (basalts/basanites and phonolites, pyroxenites and amphibole-bearing pyroxenites) interpreted to originate from separate vents. Volcanogenic deposits are defined here in the sense of McPhie et al. (1993): volcanoclastic deposits resulting from surface processes operating on pre-existing volcanic rocks. Primary volcanic facies comprise pillow lavas and scoria pillow breccias with subordinate massive lavas. Some pillow breccias and pillow fragment breccias are also found associated with them. Enclaves of plutonic ultra-alkaline rocks (pyroxenites, ijolites, melteigites, glimmerites) are common. Volcanogenic facies appear interbedded with primary volcanic facies and consist mainly of volcanic polymictic breccias with some volcanic sandstones and siltstones. Most breccias are massive, matrix-supported, although normal and inverse graded beds occur locally. Inside these breccias, sedimentary rock fragments (chert, siltstone) from the Mesozoic sedimentary series and basic or salic fragments of volcanic and plutonic rocks (nephelinites, pyroxene basalts/basanites, nepheline phonolites, ijolites, nepheline syenites, pyroxenites) are common. Sandstone and siltstone levels are constituted by basaltic/basanitic and nephelinitic partially recrystallized glassy shards, which show their original morphologies. Parallel-lamination, ripple cross-lamination, wavy and lenticular bedding are frequent in these levels. The most common clast type is blocky shards with low vesicularity and limited by curvilinear surfaces. There are also subordinate flat shards (platy shard type). In the most fine-grained levels, trace fossils and fragments of planktonic foraminifers have been found.

### ***La Herradura Formation***

It is characterized by pyroxene- or amphibole/pyroxene-bearing basalts/basanites with subordinate phonolites and volcanic sandstones. Basaltic/basanitic rocks occur as pillow lavas, scoria pillow breccias, pillow breccias, pillow-fragment breccias and resedimented pillow-fragment breccias. Inter-pillow material often contains hyaloclastic shards, fragments of pyroxene and amphibole crystals and fragments of planktonic foraminifers. The vesicularity index of pillow lavas is larger than 50%, indicating low water depths during their emission if caused by water exsolution (Jones, 1969). The orientation of breccia bedding commonly changes in short distances without relation to the general orientation of the sequence. This suggests that these deposits form part of the slopes of small overlapping volcanic cones. Phonolitic domes and flows also occur associated with autoclastic breccias and resedimented autoclastic breccias of the same composition. In some breccias, phonolite fragments are accompanied by basaltic/basanitic clasts.

### ***Los Negros Formation***

Volcanic breccias and sandstones mostly represent the volcanogenic facies. Breccias contain clasts of pyroxene-amphibole basanite/basalts, phonolites and less abundant pyroxenites and kaersutites. Sandstones contain glassy or hyaloporphyric angular shards of low vesicularity, limited by flat surfaces. The occurrence of many crystal fragments of pyroxene, amphibole and apatite is common. Some levels of microbreccias show large amounts of hyaline benthonic foraminifers (Nummulitids and Rotaliids), planktonic foraminifers, marine gastropods, bivalves and echinoderms.

### ***La Gatera Formation***

In this unit, basaltic/basanitic are dominant and comprise pillow-lavas, pillow breccias and pillow-fragment breccias. Breccia matrix is often hyaloclastitic and contains remnants of planktonic foraminifers.

### ***Toscana Formation***

Volcanogenic facies associations are again dominant and mainly represented by volcanic sandstones and siltstones with some layers of subordinated volcanic breccias. Clasts are usually basaltic/basanitic in composition although some subrounded phonolite fragments can also occur. Angular and polyhedral fragments with curvilinear surfaces are dominant in fine-grained layers. Fragments of pyroxene, amphibole, apatite and biotite crystals are common. Parallel- and ripple cross-lamination and wavy and lenticular bedding are frequent in these levels. Locally, hummocky cross bedding can occur. The silty levels show abundant bioturbation (horizontal and vertical burrows).

### ***El Valle Formation***

Three lithofacies associations are represented in this unit. These include a primary volcanic facies, a resedimented volcanoclastic facies and a sedimentary volcanogenic facies. Primary volcanoclastic and resedimented volcanoclastic facies comprise pillow lavas, pillow breccias and pillow-fragment breccias that were resedimented to different degrees. Basaltic/basanitic scoria pillow breccias also occur. In some levels, coral specimens of the Order Scleractinia appear encrusted in the outer surfaces of pillows or as a part of pillow-fragment breccias. Sedimentary volcanogenic facies associations consist of volcanic breccias, sandstones and siltstones. In the basal part of this formation, some breccia layers contain metric, stratified rock blocks that seem to come from the sandstones and siltstones of the Toscano Formation. These layers are mainly constituted by basaltic/basanitic clasts but phonolitic clasts are also common.

### **Transitional Volcanic Group**

Five units grouped into four different formations have been distinguished in this lithostratigraphic group, which are described from bottom to top.

### ***Caleta del Barco Formation***

Two different facies associations appear in this unit. Association G1 is mainly represented by trachytic breccias, including coarse-grained pyroclastic tuffs and lapilli tuffs. Clasts have different compositions, from strongly flow-foliated trachyte pumice fragments to rounded clasts of syenites, phonolites, sedimentary rocks (sandstones,

siltstones, and cherts), phlogopite/amphibole-bearing basanites and basic plutonic rocks (phlogopitites, kaersutites, and gabbros). The matrix of these breccias is always trachytic. Some layers are reversely graded. Association G2 comprises massive trachytic rocks with textures indicative of lava flows. Sometimes, they host syenite xenoliths, probably co-genetic.

### ***Piedra de Fuera Formation***

Several facies associations appear in this unit, including pillow lavas, pillow-fragment breccias, scoria pillow breccias, and phlogopite-amphibole dikes (camptonites) cutting the different units of the Submarine and Transitional Volcanic Groups. Interlayered pillow lavas and hyaloclastic breccias are locally arranged as bands or “foresets” with high primary dip.

### ***Janey Formation***

In this formation, polymictic matrix-supported conglomerates are interlayered with volcanic sandstones. Conglomerates show normal or reverse graded bedding and parallel or cross lamination. Rock fragments have a varied composition (volcanic clasts, quartzsandstones, chert, sandstones, siltstones, pyroxenites, kaersutites and syenites) and they are rounded, sometimes imbricate, and show a high sphericity index. Sandstones show normal grading and low-angle, planar cross-lamination.

### ***Barranco de la Fuente Blanca Formation***

This is a complex alternation of calcirudites, calcarenites, calcilutites and polymictic conglomerates with large variations in the proportions of bioclastic and volcanoclastic material. Robertson and Stillman (1979) previously described these layers. Clasts of igneous origin include plutonic rock fragments (syenites and gabbros), some of them highly rounded, and volcanic rocks (basalts and trachytes). Pyroxene, phlogopite, apatite and oxide mineral fragments are also common. Fragments of corals, echinoderms, bivalves, bryozoos, and benthonic (*Assilina*, Nummulitids and Rotaliids) and planktonic foraminifers are common. In some layers, there are fine-grained sedimentary fragments (lutites, cherts).

## **PETROGRAPHIC DESCRIPTION**

The nephelinite and phonolitic nephelinites are slightly altered, vesicular, microporphyritic rocks containing predominantly phenocrysts of nepheline, clinopyroxene, Fe-Ti oxide, sanidine, melanite, biotite, titanite and rare apatite and perovskite. The fine-grained to cryptocrystalline groundmass typically contains abundant clinopyroxene and nepheline, less common Fe-Ti oxide and sanidine, as well as accessory apatite. They contain also xenocrysts of amphibole, biotite and pyroxene. The basanites are slightly altered, vesicular, porphyritic rocks, with predominant pyroxene and less common kaersutite and phlogopite. These basanites show a fine-grained to cryptocrystalline and partly glassy groundmass of clinopyroxene, plagioclase, phlogopite, amphibole, and less common Fe-Ti oxides and accessory apatite. They contain xenocrysts of amphibole, biotite, titanite and pyroxene. The phonolites and trachytes are microporphyritic rocks with sanidine, biotite, titanite or nepheline as phenocrysts and a fine grained to cryptocrystalline and partly glassy groundmass of sanidine, nepheline, Fe-Ti oxide and accessory apatite. The camptonites are slightly altered, vesicular, porphyritic rocks, with predominant pyroxene, kaersutite and phlogopite, and with a fine-grained to cryptocrystalline and partly glassy groundmass of clinopyroxene, plagioclase, less common Fe-Ti oxides and accessory apatite. The piroxenites, kaersutitites, ijolites, melteigites and nephelinitic syenites are coarse-grained plutonic fragments and xenolithes consisting of interlocking crystals of nepheline, clinopyroxene, sanidine, kaersutite, phlogopite, titanite, melanite, zircon, perovskite, piroclor, Fe-Ti oxide and apatite in very variable proportions. The syenites of the strongly alkaline series are coarse-grained plutonic fragment and xenolithes consisting of interlocking crystals of clinopyroxene, sanidine, kaersutite, phlogopite, titanite, Fe-Ti oxide and apatite in very variable proportions.

## **ABSOLUTE DATING METHODS**

### **K-Ar dating**

Measurement of K-Ar ages was performed in the Institute of Nuclear Research of the Hungarian Academy of Sciences (ATOMKI), Debrecen, using a mass spectrometer and an Ar line constructed in the institute. Potassium was determined by flame photometry with Li internal standard and Na buffer. Details of methods have been described by Balogh (1985) and have been summarized by Balogh et al. (1999). The interlaboratory standards Asia 1/65, HD-B1, LP-6 and GL-O as well as atmospheric Ar were used for controlling and calibration of the analyses. Details of the instruments, the applied methods and results of calibration have been described elsewhere (Odin et al., 1982; Balogh, 1985). K-Ar ages were calculated using the constants proposed by Steiger and Jäger (1977).

### **Ar-Ar dating**

404.7 mg of CPV-2 phlogopite has been irradiated for 3 hours in the 229/3 position (out of the centre of the core) of the nuclear reactor of the Central Institute of Physics, Budapest, along with interlaboratory standards biotite LP-6. In order to homogenize the radial change of the neutron flux, the sample was rotated during irradiation by the cooling water (Balogh and Simonits, 1998). Irradiation parameter was  $J = 1.168 \times 10^{-3}$  at the place of phlogopite CPV-2. Samples were trapped in Al foil and placed in a cylindrical container made of 0.5 mm thick Cd. The Cd container was sealed hermetically in an Al canister. Ar extraction was performed in a resistance heated molybdenum furnace. Temperature was controlled with a Pt-PtRd thermocouple. The furnace was connected to the Ar purification line used for K-Ar dating. Samples were heated for 50 min at each temperature step. Procedural system blanks (atmospheric composition) were measured before degassing at each temperature step (from  $10^{-9}$  increasing to  $10^{-8} \text{ cm}^3 \text{ Ar}$  at  $1400^\circ\text{C}$ ).

## REFERENCES

- Balogh, K., 1985, K/Ar dating of Neogene activity in Hungary: experimental technique, experiences and methods of chrologic studies, ATOMKI Rep. D/1, p. 277-288.
- Balogh, K. and Simonits, A., 1998, Improvements in experimental techniques of conventional K/Ar and Ar/Ar geochronological methods. Rapid Communications of Mass Spectrometry, v. 12, p. 1769-1770.
- Balogh, K., Ahijado, A., Casillas, R., and Fernández, C., 1999, Contributions to the chronology of the Basal Complex of Fuerteventura, Canary Islands: Journal of Volcanology and Geothermal Research, v. 90, p. 81-102.
- Jones, J.G., 1969, Pillow lavas as depth indicators. American Journal of Science, v. 267, p. 181-195.
- McPhie, J., 1995, A Pliocene shoaling basaltic seamount: Ba Volcanic Group at Rakiraki, Fiji: Journal of Volcanology and Geothermal Research, v.64, p. 193-210.
- Odin, G.S., and 35 co-authors 1982, Interlaboratory standars for dating purposes. In: Odin, G.S. (Ed.), Numerical Dating in Stratigraphy. Wiley, Chichester, p. 123-150.
- Robertson, A. H. F., and Stillman, C.J., 1979, Submarine volcanic and associated sedimentary rocks of the Fuerteventura Basal Complex, Canary Islands: Geological Magazine, v. 116, p. 203-214.
- Steiger, R.H., and Jäger, E., 1977, Subcommision on geochronology: convention on the use of decay constants in geo and cosmochrology: Earth and Planetary Science Letters, v. 12, p. 359-362.
